# Supplementary material for: Specific excitatory connectivity for feature integration in mouse primary visual cortex
Source: PLOS journal article supplement (doi:10.1371/journal.pcbi.1005888), 2017-12-14
Supplement: S1 (10.1371/journal.pcbi.1005888.s001) [file journal.pcbi.1005888.s001]

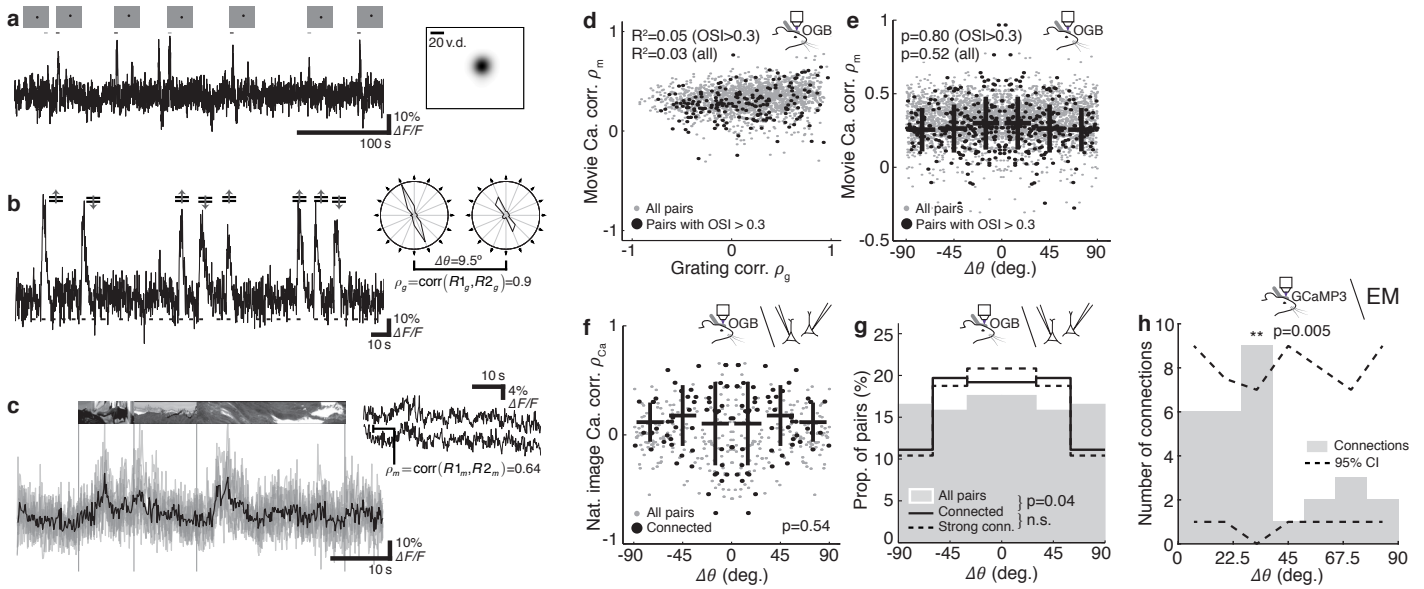

**Supporting Figure 1: Connected neurons span a wide range of preferred orientations in mouse V1. a** Characterisation of receptive field location using sparse drifting/rotating grating stimuli. Single-trial OGB calcium responses (black); presentation time of optimal stimulus and sub-optimal stimulus indicated (black and grey bars). Right inset: estimated RF location for the same neuron. **b** Single-trial OGB calcium response to drifting grating stimuli (black); presentation of optimal stimulus orientation indicated above, all stimulus presentation times indicated below. Right inset: calculation of grating response similarity  $\rho_g$  between two neurons. **c** Single-trial (grey) and trial-averaged OGB calcium response (black) to natural movie stimuli. Vertical lines indicate timing of movie sequence onset. Right inset: calculation of movie response similarity ( $\rho_m$ ), using signal correlations over trial-averaged responses from two neurons. **d** Pairs of neurons with high signal correlations to natural movies ( $\rho_m$ ), which predicts a high probability of connection [21], can have similar or dissimilar grating responses. Pairs of neurons with similar orientation preference are not more likely to have high  $\rho_m$  (**e**) or high signal correlation to flashed natural scenes  $\rho_{Ca}$  (**f**) than pairs with dissimilar orientation preference. **g** Connected pairs are slightly more likely to share similar orientation preferences than unconnected pairs [21,24], but nevertheless span almost arbitrary orientation differences ( $\approx 20\%$  of pairs with close to orthogonal orientation preference). **h** In data from functionally characterized neurons with connections reconstructed under electron microscopy [25], connected pairs are more likely to share similar preferred orientations. An excess of connections was present at orientation preference differences of around  $30^\circ$  ( $p = 0.005$ , Monte-Carlo test). Dashed lines: 95% bootstrap confidence intervals (CI). **d-e**: in vivo two-photon calcium imaging; **f-g**: in vivo calcium imaging coupled with in vitro simultaneous patching to detect connected pairs; data from [24]. **h**: in vivo calcium imaging coupled with electron microscopy (EM) reconstruction to identify connected neurons; data from [25]. **e-f**: Kruskal-Wallis tests; **g**: Ansari-Bradley test; **h**: Monte-carlo test. n.s.:  $p > 0.05$ . Strong connections: strongest 50% of connected pairs, measured by EPSP amplitude. Corr: correlation; conn.: connection.
